# Supplementary material for: hnRNP K Coordinates Transcriptional Silencing by SETDB1 in Embryonic Stem Cells
Source: PubMed Central journal article supplement (PMC4303303; doi:10.1371/journal.pgen.1004933), 2015-01-22
Supplement: pgen.1004933.s009.pdf [file pgen.1004933.s009.pdf]

**Genes upregulated in common in hnRNP K KD biological replicates (264)**

Ngfr  
Clec10a  
Ccl3  
Ckb  
Nkx2-1  
Sfpi1  
Cd97  
Apoe  
Hspb1  
Casp14  
Hmox1  
Gata6  
Calcoco2  
Ctsd  
Sertad1  
Kcnq1  
Taf7l  
Dazl  
Gadd45b  
Gata3  
Lama5  
Col20a1  
Sdc4  
Pltp  
Mapt  
Tbx3  
Cd68  
Atp6ap1  
Perp  
Mgat4c  
Ctgf  
Mdm2  
Phlda1  
Ccng1  
Btg2  
Id2  
Arg2  
Fbp2  
Plk2  
Anxa8  
1190002H23Rik  
Dab2  
Alcam

Pros1  
Zfp641  
Cdkn1a  
Cpn2  
Cndp2  
Ankrd22  
Dkk1  
Cpt1a  
Gsto1  
Hexa  
Cd63  
Ddit3  
Eps8l2  
Pramel6  
Pdgfa  
Tcfcp2l1  
Cd55  
Chit1  
1700007K13Rik  
Dpp7  
Nkx2-2  
8030411F24Rik  
Cst9  
Mfsd1  
Mme  
Tacr3  
Wls  
Cyr61  
Trp53inp1  
Aqp3  
4930579C15Rik  
Laptm5  
Fabp3  
Tinagl1  
Gpatch3  
Abcb1b  
Trp73  
Lrpap1  
Agpat9  
Slc6a12  
Tead4  
Mfge8  
Spns1  
Dkk1  
Tpp1  
Bgn

Renbp  
Lamp1  
Col4a1  
Col4a2  
Slc25a4  
Ces2e  
Gabarapl2  
Tbx20  
Cryab  
1600029D21Rik  
Ankk1  
Rbp2  
Glt25d2  
Wnt6  
Crlf2  
Cml2  
Cfhr2  
Tmem132c  
AI661453  
Grn  
Rtkn  
B020004J07Rik  
A430110N23Rik  
Foxa1  
Colec11  
Pramel5  
Gm12800  
Nodal  
Vnn1  
Atg14  
Kcnk2  
Satb2  
Pmepa1  
Gdf15  
Sct  
Tex19.1  
Tnrc18  
Fam190a  
Cpeb2  
Cited2  
Havcr1  
Timd2  
Ltb4r2  
Matn1  
Mael  
Erf  
Rnasek

Phlda3  
Svop  
4933440N22Rik  
S100a13  
Snai1  
Dub3  
Gm14492  
Ly6k  
Phf11  
Ankrd45  
Cirbp  
Dcaf12l1  
Chrm3  
Gm13078  
Gprc5a  
8030474K03Rik  
Ddit4l  
Spz1  
H2-M10.4  
Igf2  
Lgals3  
Ftl1  
Ptges  
Islr2  
AU021092  
Wfdc15a  
C130026l21Rik  
Krt15  
Zscan4c  
Dub1  
Gm9982  
Foxi3  
Dub2a  
Gm15698  
Olfr787  
Tdpoz3  
Nkx2-9  
Zfp353  
Usp17l5  
Tdpoz1  
Tdpoz4  
Gm8994  
Olfr815  
Dub1a  
Tex101  
Gm6406  
Slc39a4

Gm5576  
Arl9  
Olfr376  
Gm11232  
Iqcf1  
Gm13083  
Cyp2b19  
Trim43a  
Tlx2  
Aard  
Flnc  
Slc25a31  
Zbtb10  
Fbp1  
Ahnak  
Sp110  
BC080695  
Gm13119  
Zscan4-ps2  
Zscan4f  
Gm12794  
Zfp352  
Gm428  
BB287469  
Abcb5  
Ahnak2  
Gm6468  
Gm10424  
Gm5662  
Nup62cl  
C4b  
AA792892  
Gm6502  
Gm16522  
Gm7647  
Gm10526  
Gm10527  
Gm10528  
Btbd19  
Gm6509  
Gm3147  
Gm7682  
Gm10696  
Gm4858  
Ubtfl1  
Bhmt  
Gm10775

Gm10807  
Bex6  
Tmem92-ps  
Ass1  
Gm11564  
Gm13128  
Pramef17  
Gm13109  
Pramef6  
Gm2016  
Gm2046  
Gm8300  
C86695  
Trim43b  
Glb1  
Gm5698  
Gm5699  
Gm4778  
Acad11  
Gm16478  
Gm7957  
Gm6189  
Zscan4d  
Gm4340  
Gm4840  
Vgll3  
Gm8766  
Zscan4b  
Gm4902  
Gm2075  
Zscan4e  
Gm8038  
Gm4027  
Gm6804

**Genes downregulated in common between hnRNP K KD biological replicates (26)**

Pdk1  
Lphn1  
Cenpv  
Rad50  
Hnrnpk  
Tpi1  
Pycr1  
Scd2  
Ifitm1  
Pecr  
Tuba4a  
Plac8  
Mt3  
Nedd4  
Scd1  
Egr1  
Foxk2  
Bag2  
Phgdh  
U2af1  
Tubb4  
Ldha  
Gm7964  
Slfn9  
Cisd3  
2310009B15Rik

| TE family             | Number of elements | siCtrl #1 RNA-seq (RPKM) | siCtrl #2 RNA-seq (RPKM) | Hnrnpk KD #1 RNA-seq (RPKM) | Hnrnpk KD #2 RNA-seq (RPKM) | Fold Change (Hnrnpk KD #1/siCtrl #1) | Fold Change (Hnrnpk KD #2/siCtrl #2) |
|-----------------------|--------------------|--------------------------|--------------------------|-----------------------------|-----------------------------|--------------------------------------|--------------------------------------|
| LTR:ERVL:MERVL-int    | 2599               | 0.013                    | 0.015                    | 0.217                       | 0.442                       | 16.661                               | 30.143                               |
| LTR:ERVL:MT2_Mm       | 2671               | 0.016                    | 0.018                    | 0.221                       | 0.463                       | 14.206                               | 26.328                               |
| LTR:ERV1:MER67D       | 462                | 0.000                    | 0.000                    | 0.001                       | 0.002                       | 10.861                               | 16.131                               |
| LTR:ERVK:ETnERV3-int  | 945                | 0.005                    | 0.006                    | 0.019                       | 0.026                       | 4.043                                | 4.161                                |
| LTR:ERV1:RLTR6_Mm     | 1202               | 0.014                    | 0.016                    | 0.052                       | 0.073                       | 3.764                                | 4.667                                |
| LTR:ERVK:RLTR13B2     | 320                | 0.008                    | 0.010                    | 0.029                       | 0.046                       | 3.479                                | 4.823                                |
| LTR:Gypsy?:LTR85a     | 236                | 0.009                    | 0.008                    | 0.030                       | 0.017                       | 3.457                                | 2.082                                |
| LTR:ERVL:LTR84b       | 185                | 0.012                    | 0.011                    | 0.039                       | 0.063                       | 3.328                                | 5.776                                |
| LTR:Genie?:LTR88c     | 126                | 0.001                    | 0.003                    | 0.002                       | 0.016                       | 3.254                                | 5.357                                |
| LTR:ERVL:MER70B       | 257                | 0.001                    | 0.003                    | 0.004                       | 0.003                       | 3.200                                | 0.885                                |
| LTR:ERVL:LTR80B       | 113                | 0.001                    | 0.002                    | 0.003                       | 0.002                       | 3.200                                | 0.860                                |
| LTR:ERV1:MER67C       | 617                | 0.002                    | 0.002                    | 0.005                       | 0.004                       | 2.987                                | 1.801                                |
| LTR:ERV1:RLTR4_MM-int | 502                | 0.034                    | 0.034                    | 0.095                       | 0.316                       | 2.794                                | 9.172                                |
| LTR:ERVL:LTR75        | 105                | 0.005                    | 0.008                    | 0.014                       | 0.020                       | 2.760                                | 2.589                                |
| LTR:MaLR:MLT1E1       | 581                | 0.003                    | 0.003                    | 0.008                       | 0.003                       | 2.619                                | 1.041                                |
| LTR:ERVK:RLTR13A      | 377                | 0.013                    | 0.015                    | 0.034                       | 0.036                       | 2.567                                | 2.384                                |
| LINE:L1:L1MEb         | 375                | 0.031                    | 0.036                    | 0.079                       | 0.005                       | 2.520                                | 0.128                                |
| LTR:MaLR:MTE2b-int    | 725                | 0.009                    | 0.010                    | 0.021                       | 0.021                       | 2.363                                | 2.153                                |
| LTR:ERV1:LTR68        | 112                | 0.004                    | 0.006                    | 0.009                       | 0.005                       | 2.337                                | 0.811                                |
| LTR:Gypsy?:LTR85c     | 128                | 0.003                    | 0.002                    | 0.007                       | 0.029                       | 2.337                                | 11.957                               |
| LINE:L1:L1M6          | 370                | 0.002                    | 0.002                    | 0.004                       | 0.003                       | 2.327                                | 1.658                                |
| LTR:ERVK:IAPLTR4_I    | 246                | 0.000                    | 0.001                    | 0.001                       | 0.003                       | 2.326                                | 5.488                                |
| LTR:ERV1:RLTR4_Mm     | 222                | 0.196                    | 0.217                    | 0.452                       | 0.701                       | 2.302                                | 3.235                                |
| LTR:ERVK:RLTR19       | 1023               | 0.030                    | 0.029                    | 0.068                       | 0.053                       | 2.302                                | 1.825                                |
| LTR:Gypsy:MamGypLTR1b | 145                | 0.009                    | 0.008                    | 0.021                       | 0.011                       | 2.297                                | 1.278                                |
| LTR:ERVK:RNLTR23      | 503                | 0.002                    | 0.004                    | 0.005                       | 0.005                       | 2.252                                | 1.306                                |
| LTR:MaLR:ORR1A3-int   | 2455               | 0.025                    | 0.026                    | 0.056                       | 0.095                       | 2.241                                | 3.657                                |
| LTR:ERVK:RLTR13D4     | 276                | 0.007                    | 0.006                    | 0.016                       | 0.012                       | 2.197                                | 1.864                                |



|                         |       |       |       |       |       |       |        |
|-------------------------|-------|-------|-------|-------|-------|-------|--------|
| LTR:ERVK:RLTR13D5       | 705   | 0.006 | 0.006 | 0.013 | 0.013 | 2.168 | 2.107  |
| LTR:ERV1:RMER21B        | 1262  | 0.010 | 0.010 | 0.022 | 0.026 | 2.114 | 2.614  |
| LTR:MaLR:MLT1C-int      | 127   | 0.010 | 0.010 | 0.020 | 0.000 | 2.067 | 0.038  |
| LTR:ERV1:LTR31          | 199   | 0.006 | 0.010 | 0.011 | 0.008 | 2.018 | 0.820  |
| LINE:L1:L1Md_T          | 23234 | 0.007 | 0.008 | 0.015 | 0.023 | 2.010 | 2.841  |
| LINE:L1:L1MEe           | 1227  | 0.062 | 0.064 | 0.121 | 0.007 | 1.974 | 0.105  |
| LTR:ERVK:RLTR44A        | 240   | 0.037 | 0.037 | 0.072 | 0.003 | 1.964 | 0.090  |
| LTR:ERVK:RLTR26         | 2048  | 0.011 | 0.012 | 0.021 | 0.021 | 1.940 | 1.717  |
| LTR:ERVK:RLTR19B        | 228   | 0.006 | 0.007 | 0.012 | 0.016 | 1.935 | 2.202  |
| LTR:ERVK:RMER17D        | 1178  | 0.066 | 0.063 | 0.125 | 0.130 | 1.913 | 2.066  |
| LINE:L1:L1M             | 470   | 0.008 | 0.008 | 0.015 | 0.012 | 1.907 | 1.555  |
| LTR:ERVL:ERVL-E-int     | 1116  | 0.009 | 0.009 | 0.018 | 0.003 | 1.894 | 0.336  |
| LTR:ERVK:RLTR10D        | 882   | 0.007 | 0.007 | 0.014 | 0.036 | 1.872 | 5.236  |
| LTR:ERVL:MLT2D          | 1564  | 0.004 | 0.004 | 0.007 | 0.012 | 1.834 | 2.954  |
| LTR:ERVL:MER70A         | 181   | 0.003 | 0.004 | 0.006 | 0.003 | 1.833 | 0.737  |
| LINE:L1:MusHAL1         | 5895  | 0.003 | 0.003 | 0.005 | 0.005 | 1.833 | 1.463  |
| LTR:ERV1:RLTR1D         | 511   | 0.011 | 0.011 | 0.020 | 0.030 | 1.823 | 2.791  |
| LTR:MaLR:MLT1J-int      | 509   | 0.004 | 0.005 | 0.008 | 0.003 | 1.814 | 0.565  |
| LINE:L1:L1Md_Gf         | 994   | 0.004 | 0.005 | 0.008 | 0.021 | 1.809 | 4.574  |
| LINE:L1:Lx2A            | 1394  | 0.001 | 0.001 | 0.002 | 0.002 | 1.802 | 2.770  |
| LTR:ERVL:MER73          | 136   | 0.001 | 0.002 | 0.002 | 0.001 | 1.802 | 0.455  |
| LTR:ERVK:RLTR13D6       | 1237  | 0.005 | 0.006 | 0.010 | 0.011 | 1.787 | 1.935  |
| LINE:L1:L1M3de          | 170   | 0.027 | 0.027 | 0.048 | 0.001 | 1.777 | 0.043  |
| LTR:MaLR:ORR1D2-int     | 1364  | 0.009 | 0.010 | 0.015 | 0.018 | 1.771 | 1.827  |
| LTR:ERVK:IAPEz-int      | 7826  | 0.018 | 0.017 | 0.032 | 0.053 | 1.762 | 3.070  |
| LTR:ERVK:RLTR42-int     | 2453  | 0.006 | 0.006 | 0.011 | 0.058 | 1.741 | 9.636  |
| LTR:ERVK:RMER20A        | 1693  | 0.005 | 0.006 | 0.009 | 0.024 | 1.734 | 4.057  |
| LTR:ERV1:RLTR47_MM      | 663   | 0.013 | 0.015 | 0.023 | 0.032 | 1.724 | 2.172  |
| LTR:ERVK:MurERV4_19-int | 988   | 0.003 | 0.003 | 0.005 | 0.035 | 1.722 | 11.348 |
| LTR:ERVK:IAPEy-int      | 727   | 0.001 | 0.001 | 0.002 | 0.002 | 1.717 | 1.353  |
| LTR:ERV1:MER52-int      | 199   | 0.004 | 0.006 | 0.006 | 0.015 | 1.708 | 2.475  |
| LTR:ERVK:MMERVK10C-int  | 3437  | 0.008 | 0.009 | 0.014 | 0.021 | 1.706 | 2.273  |

|                      |       |       |       |       |       |       |       |
|----------------------|-------|-------|-------|-------|-------|-------|-------|
| LTR:ERV1:MLT2C1      | 870   | 0.003 | 0.003 | 0.006 | 0.004 | 1.697 | 1.276 |
| LINE:L1:L1M1         | 927   | 0.008 | 0.007 | 0.013 | 0.004 | 1.694 | 0.586 |
| LTR:ERVK:IAPEY_LTR   | 1087  | 0.002 | 0.002 | 0.003 | 0.007 | 1.693 | 3.022 |
| SINE:Alu:AluG_3      | 282   | 0.229 | 0.246 | 0.387 | 0.413 | 1.688 | 1.679 |
| LTR:ERVK:BGLII_Mus   | 624   | 0.004 | 0.004 | 0.007 | 0.003 | 1.688 | 0.707 |
| LINE:L1:L1MCb        | 729   | 0.002 | 0.002 | 0.004 | 0.002 | 1.685 | 1.362 |
| LTR:MaLR:MT-int      | 431   | 0.016 | 0.017 | 0.026 | 0.023 | 1.664 | 1.338 |
| LINE:L1:L1VL4        | 6954  | 0.005 | 0.005 | 0.008 | 0.009 | 1.661 | 1.716 |
| LTR:ERV1:LTRIS2      | 1439  | 0.086 | 0.084 | 0.142 | 0.277 | 1.656 | 3.302 |
| LTR:ERVK:IAPLTR1_Mm  | 1511  | 0.056 | 0.052 | 0.093 | 0.132 | 1.654 | 2.552 |
| LTR:ERV1:LTR40a      | 720   | 0.003 | 0.004 | 0.006 | 0.005 | 1.645 | 1.213 |
| LTR:ERVK:RMER13B     | 2196  | 0.004 | 0.004 | 0.007 | 0.007 | 1.645 | 1.900 |
| LTR:ERVK:RLTR44-int  | 635   | 0.024 | 0.024 | 0.040 | 0.005 | 1.644 | 0.201 |
| LINE:L1:Lx3C         | 8467  | 0.002 | 0.002 | 0.004 | 0.003 | 1.643 | 1.128 |
| LTR:ERVK:RLTR10C     | 1788  | 0.012 | 0.013 | 0.019 | 0.010 | 1.639 | 0.768 |
| LINE:L1:L1M3d        | 162   | 0.006 | 0.010 | 0.010 | 0.004 | 1.634 | 0.364 |
| LINE:L1:L1MA5        | 4975  | 0.007 | 0.007 | 0.012 | 0.006 | 1.630 | 0.872 |
| LTR:ERVK:RLTR22_Mus  | 1258  | 0.013 | 0.013 | 0.020 | 0.018 | 1.614 | 1.417 |
| LTR:ERVK:RMER16-int  | 3621  | 0.020 | 0.020 | 0.032 | 0.040 | 1.613 | 1.950 |
| LTR:MaLR:MLT1D-int   | 176   | 0.010 | 0.012 | 0.015 | 0.004 | 1.610 | 0.310 |
| LTR:ERV1:LTR84a      | 138   | 0.006 | 0.004 | 0.009 | 0.003 | 1.605 | 0.802 |
| LTR:ERV1:HERVL74-int | 151   | 0.013 | 0.016 | 0.021 | 0.015 | 1.604 | 0.960 |
| LTR:ERV1:MER57F      | 181   | 0.007 | 0.007 | 0.011 | 0.018 | 1.604 | 2.573 |
| LTR:ERV1:LTR37A      | 549   | 0.006 | 0.007 | 0.010 | 0.005 | 1.599 | 0.670 |
| LTR:ERVK:RLTR43A     | 242   | 0.002 | 0.003 | 0.003 | 0.004 | 1.597 | 1.567 |
| LTR:ERVK:IAP-d-int   | 1817  | 0.004 | 0.004 | 0.006 | 0.022 | 1.593 | 5.756 |
| LTR:ERV1:LTRIS3      | 194   | 0.017 | 0.012 | 0.027 | 0.030 | 1.590 | 2.437 |
| LINE:L1:L1Md_A       | 16293 | 0.002 | 0.002 | 0.004 | 0.005 | 1.590 | 2.273 |
| LTR:ERV1:MER110      | 144   | 0.001 | 0.001 | 0.002 | 0.001 | 1.588 | 1.126 |
| LTR:ERV1?:LTR81B     | 209   | 0.003 | 0.003 | 0.005 | 0.002 | 1.583 | 0.810 |
| LTR:ERVK:RLTR25B     | 4500  | 0.016 | 0.019 | 0.025 | 0.044 | 1.582 | 2.336 |
| LTR:ERVK:RLTR10B2    | 850   | 0.004 | 0.004 | 0.006 | 0.004 | 1.579 | 1.165 |

|                         |       |       |       |       |       |       |        |
|-------------------------|-------|-------|-------|-------|-------|-------|--------|
| LTR:ERV1:MER89          | 618   | 0.032 | 0.032 | 0.050 | 0.104 | 1.576 | 3.261  |
| LINE:L1:L1MEf           | 3524  | 0.009 | 0.010 | 0.015 | 0.006 | 1.575 | 0.603  |
| LTR:ERV1:MuLV-int       | 474   | 0.302 | 0.334 | 0.473 | 0.534 | 1.569 | 1.602  |
| LTR:Gypsy:MamGypLTR3    | 115   | 0.006 | 0.006 | 0.009 | 0.014 | 1.565 | 2.368  |
| LINE:L1:L1MEg2          | 106   | 0.001 | 0.003 | 0.002 | 0.006 | 1.565 | 1.668  |
| LTR:ERVK:RLTR9D         | 826   | 0.025 | 0.026 | 0.039 | 0.037 | 1.564 | 1.408  |
| LTR:ERV1:MURVY-LTR      | 1489  | 0.005 | 0.005 | 0.007 | 0.006 | 1.563 | 1.332  |
| LTR:ERV1:RMER2          | 2340  | 0.007 | 0.007 | 0.011 | 0.013 | 1.558 | 1.972  |
| LTR:MaLR:MLT1E          | 533   | 0.013 | 0.015 | 0.020 | 0.008 | 1.558 | 0.534  |
| LTR:ERV1:MURVY-int      | 434   | 0.000 | 0.000 | 0.000 | 0.001 | 1.554 | 3.780  |
| LINE:L1:L1ME3           | 1250  | 0.006 | 0.005 | 0.009 | 0.004 | 1.554 | 0.871  |
| LTR:ERV1:RodERV21-int   | 1848  | 0.006 | 0.006 | 0.009 | 0.015 | 1.552 | 2.435  |
| LTR:ERV1:RLTR1C         | 707   | 0.006 | 0.006 | 0.009 | 0.009 | 1.551 | 1.589  |
| LTR:ERVK:RMER6-int      | 613   | 0.004 | 0.005 | 0.006 | 0.006 | 1.550 | 1.081  |
| LTR:MaLR:MLT1K          | 2798  | 0.040 | 0.043 | 0.063 | 0.059 | 1.550 | 1.393  |
| LTR:ERV1:MER67A         | 175   | 0.002 | 0.003 | 0.003 | 0.003 | 1.549 | 0.979  |
| LTR:ERVK:RLTR33         | 1583  | 0.016 | 0.016 | 0.025 | 0.021 | 1.548 | 1.302  |
| LTR:MaLR:MLT1F1         | 1609  | 0.007 | 0.008 | 0.011 | 0.009 | 1.547 | 1.117  |
| LTR:ERV1:MER31A         | 712   | 0.021 | 0.019 | 0.032 | 0.031 | 1.546 | 1.616  |
| LINE:L1:L1_Mur2         | 19348 | 0.002 | 0.002 | 0.003 | 0.025 | 1.541 | 11.374 |
| LTR:ERVK:RMER16         | 2041  | 0.009 | 0.010 | 0.015 | 0.024 | 1.537 | 2.374  |
| LINE:L1:L1_Rod          | 11246 | 0.003 | 0.004 | 0.005 | 0.003 | 1.535 | 0.910  |
| LTR:ERVK:RLTR13A3       | 243   | 0.009 | 0.008 | 0.014 | 0.012 | 1.534 | 1.499  |
| LINE:L1:Lx3B            | 5831  | 0.006 | 0.006 | 0.009 | 0.006 | 1.534 | 1.050  |
| LINE:L1:L1M2            | 18591 | 0.008 | 0.008 | 0.012 | 0.009 | 1.531 | 1.069  |
| LTR:ERVK:RLTR45         | 1685  | 0.012 | 0.012 | 0.019 | 0.041 | 1.520 | 3.499  |
| LTR:ERVK:RMER6D         | 2400  | 0.005 | 0.006 | 0.008 | 0.006 | 1.519 | 0.948  |
| LTR:ERVK:RMER6C         | 4853  | 0.003 | 0.004 | 0.005 | 0.003 | 1.517 | 0.892  |
| LTR:ERVL:LTR40b         | 574   | 0.003 | 0.005 | 0.005 | 0.004 | 1.517 | 0.918  |
| LTR:MaLR:MLT1G1         | 1074  | 0.086 | 0.097 | 0.130 | 0.062 | 1.516 | 0.643  |
| LTR:ERVK:MYSERV16_I-int | 2514  | 0.007 | 0.007 | 0.010 | 0.004 | 1.512 | 0.567  |
| LTR:MaLR:MLT1L          | 1554  | 0.006 | 0.005 | 0.009 | 0.062 | 1.502 | 12.219 |

|                      |       |       |       |       |       |       |        |
|----------------------|-------|-------|-------|-------|-------|-------|--------|
| LTR:ERVK:IAPLTR1a_Mm | 1945  | 0.011 | 0.011 | 0.017 | 0.018 | 1.501 | 1.653  |
| LTR:ERVK:RMER6B      | 2008  | 0.017 | 0.016 | 0.025 | 0.037 | 1.497 | 2.292  |
| LTR:MaLR:MLT1H-int   | 366   | 0.002 | 0.003 | 0.003 | 0.002 | 1.495 | 0.705  |
| LTR:ERV1:MMVL30-int  | 925   | 0.025 | 0.029 | 0.037 | 0.053 | 1.494 | 1.856  |
| LTR:ERV1:MER21B      | 3495  | 0.016 | 0.017 | 0.024 | 0.026 | 1.490 | 1.554  |
| LINE:L1:L1Md_F3      | 15614 | 0.003 | 0.003 | 0.004 | 0.006 | 1.489 | 1.871  |
| LINE:L1:L1P5         | 177   | 0.017 | 0.016 | 0.026 | 0.010 | 1.486 | 0.608  |
| LTR:ERVK:RLTR31_Mm   | 1178  | 0.008 | 0.008 | 0.012 | 0.008 | 1.482 | 1.003  |
| LTR:ERVK:RLTR13D2    | 327   | 0.006 | 0.005 | 0.008 | 0.022 | 1.482 | 4.563  |
| LTR:ERVK:RMER17A     | 1809  | 0.005 | 0.006 | 0.008 | 0.015 | 1.481 | 2.637  |
| LTR:MaLR:MLT1G       | 872   | 0.004 | 0.003 | 0.005 | 0.007 | 1.472 | 2.248  |
| LTR:ERVL:MER77       | 875   | 0.009 | 0.011 | 0.014 | 0.018 | 1.470 | 1.586  |
| LTR:ERVK:RLTR13B3    | 263   | 0.010 | 0.010 | 0.015 | 0.020 | 1.467 | 2.120  |
| LTR:ERVK:RLTR9E      | 1627  | 0.079 | 0.086 | 0.116 | 0.202 | 1.465 | 2.353  |
| LINE:L1:L1_Mur1      | 10401 | 0.002 | 0.002 | 0.003 | 0.165 | 1.462 | 89.938 |
| LINE:L1:Lx7          | 42027 | 0.003 | 0.004 | 0.005 | 0.004 | 1.462 | 1.185  |
| LTR:ERVK:MYSERV6-int | 3158  | 0.013 | 0.014 | 0.020 | 0.025 | 1.462 | 1.782  |
| LTR:ERVL:LTR16A      | 1500  | 0.003 | 0.004 | 0.005 | 0.009 | 1.461 | 2.292  |
| LTR:ERVK:RLTR31_Mur  | 648   | 0.015 | 0.014 | 0.021 | 0.010 | 1.460 | 0.747  |
| LTR:MaLR:MLT1H2      | 1050  | 0.012 | 0.012 | 0.017 | 0.007 | 1.458 | 0.590  |
| LINE:L1:L1Mca        | 3656  | 0.015 | 0.015 | 0.022 | 0.006 | 1.455 | 0.391  |
| LTR:ERVK:RLTR20B2    | 952   | 0.005 | 0.005 | 0.007 | 0.003 | 1.454 | 0.685  |
| LINE:L1:Lx3_Mus      | 12000 | 0.002 | 0.002 | 0.003 | 0.003 | 1.453 | 1.307  |
| LINE:L1:L1M4c        | 3047  | 0.007 | 0.007 | 0.010 | 0.009 | 1.450 | 1.252  |
| LTR:ERV1:MER34A      | 700   | 0.004 | 0.005 | 0.006 | 0.006 | 1.450 | 1.206  |
| LTR:ERVK:RMER3D-int  | 2706  | 0.004 | 0.004 | 0.006 | 0.004 | 1.444 | 0.801  |
| LTR:LTR:LTR90B       | 101   | 0.006 | 0.005 | 0.008 | 0.007 | 1.444 | 1.471  |
| LTR:ERV1:RLTR1B-int  | 789   | 0.549 | 0.503 | 0.791 | 0.927 | 1.441 | 1.844  |
| LINE:L1:L1_Mus4      | 11073 | 0.002 | 0.002 | 0.003 | 0.003 | 1.440 | 1.458  |
| LTR:MaLR:MTEa-int    | 1396  | 0.007 | 0.008 | 0.011 | 0.008 | 1.440 | 1.034  |
| LINE:L1:L1_Mus2      | 19548 | 0.002 | 0.003 | 0.004 | 0.011 | 1.440 | 4.244  |
| LTR:ERVL:RLTR28B     | 841   | 0.010 | 0.009 | 0.014 | 0.013 | 1.437 | 1.477  |

|                       |       |       |       |       |       |       |        |
|-----------------------|-------|-------|-------|-------|-------|-------|--------|
| LTR:ERVK:RLTR13A2     | 167   | 0.047 | 0.050 | 0.067 | 0.009 | 1.436 | 0.185  |
| LINE:L1:L1MB2         | 2917  | 0.058 | 0.061 | 0.083 | 0.006 | 1.431 | 0.091  |
| LINE:L1:L1Md_F2       | 65451 | 0.002 | 0.003 | 0.003 | 0.004 | 1.428 | 1.656  |
| LTR:ERVK:RLTR13C2     | 930   | 0.009 | 0.011 | 0.013 | 0.011 | 1.427 | 0.998  |
| LINE:L1:L1MA4A        | 2668  | 0.005 | 0.005 | 0.007 | 0.006 | 1.426 | 1.087  |
| LTR:ERVK:RLTR20A1     | 277   | 0.012 | 0.014 | 0.018 | 0.006 | 1.425 | 0.392  |
| LTR:ERVK:RMER20B      | 3475  | 0.011 | 0.012 | 0.016 | 0.020 | 1.422 | 1.608  |
| LTR:ERVK:RMER17C      | 8430  | 0.011 | 0.011 | 0.016 | 0.025 | 1.420 | 2.244  |
| LTR:ERV1:MuRRS4-int   | 2895  | 0.006 | 0.006 | 0.008 | 0.010 | 1.418 | 1.601  |
| LTR:ERV1:MER92B       | 240   | 0.003 | 0.002 | 0.004 | 0.166 | 1.417 | 93.580 |
| LTR:ERVK:RLTR9A2      | 241   | 0.011 | 0.014 | 0.016 | 0.019 | 1.415 | 1.382  |
| LINE:L1:L1MA7         | 3248  | 0.008 | 0.008 | 0.011 | 0.005 | 1.414 | 0.698  |
| LINE:L1:L1ME3B        | 1505  | 0.042 | 0.042 | 0.059 | 0.014 | 1.412 | 0.330  |
| LINE:L1:L1ME4a        | 1778  | 0.062 | 0.063 | 0.087 | 0.019 | 1.409 | 0.304  |
| LINE:L1:L1MD          | 6285  | 0.009 | 0.009 | 0.012 | 0.007 | 1.408 | 0.868  |
| LTR:ERVK:RLTR45-int   | 2294  | 0.014 | 0.013 | 0.020 | 0.027 | 1.407 | 2.031  |
| LTR:ERV1:LTR65        | 165   | 0.053 | 0.061 | 0.074 | 0.070 | 1.404 | 1.144  |
| LTR:ERV1:MER34A1      | 540   | 0.256 | 0.240 | 0.359 | 0.372 | 1.402 | 1.548  |
| LTR:ERVL:MERVL_2A-int | 3762  | 0.017 | 0.018 | 0.024 | 0.067 | 1.402 | 3.773  |
| LTR:ERVL:MT2C_Mm      | 2010  | 0.018 | 0.020 | 0.026 | 0.030 | 1.399 | 1.533  |
| LTR:ERVK:RLTR13B1     | 1042  | 0.005 | 0.005 | 0.007 | 0.007 | 1.396 | 1.330  |
| LTR:ERVK:RLTR44B      | 247   | 0.005 | 0.006 | 0.007 | 0.008 | 1.394 | 1.444  |
| LTR:ERVK:RLTR9B       | 256   | 0.011 | 0.012 | 0.015 | 0.015 | 1.392 | 1.184  |
| LTR:ERVK:MurERV4-int  | 1519  | 0.030 | 0.031 | 0.041 | 0.010 | 1.389 | 0.329  |
| LINE:L1:L1MB4         | 2718  | 0.012 | 0.014 | 0.017 | 0.005 | 1.388 | 0.401  |
| LINE:L1:L1MA6         | 7031  | 0.005 | 0.005 | 0.006 | 0.017 | 1.384 | 3.718  |
| LTR:ERV1:RLTR23       | 3026  | 0.009 | 0.009 | 0.012 | 0.013 | 1.376 | 1.374  |
| LTR:MaLR:MLT1A        | 5033  | 0.006 | 0.006 | 0.008 | 0.006 | 1.374 | 1.021  |
| LINE:L1:L1MB1         | 2480  | 0.004 | 0.005 | 0.006 | 0.004 | 1.373 | 0.842  |
| LINE:CR1:CR1_Mam      | 267   | 0.013 | 0.015 | 0.018 | 0.106 | 1.371 | 7.133  |
| LINE:L1:Lx4A          | 10668 | 0.003 | 0.003 | 0.004 | 0.002 | 1.369 | 0.788  |
| LTR:ERV1:MuRRS-int    | 811   | 0.003 | 0.003 | 0.004 | 0.007 | 1.367 | 2.518  |

|                       |       |       |       |       |       |       |        |
|-----------------------|-------|-------|-------|-------|-------|-------|--------|
| LTR:ERVL:MLT2F        | 569   | 0.008 | 0.008 | 0.012 | 0.186 | 1.366 | 23.395 |
| LTR:ERVK:RLTR8        | 310   | 0.012 | 0.015 | 0.017 | 0.048 | 1.361 | 3.139  |
| LTR:ERVK:RLTR21       | 3539  | 0.009 | 0.009 | 0.012 | 0.011 | 1.359 | 1.202  |
| LINE:L1:L1M5          | 17544 | 0.008 | 0.009 | 0.011 | 0.009 | 1.356 | 1.001  |
| LTR:ERVK:RNERVK23-int | 754   | 0.016 | 0.017 | 0.022 | 0.033 | 1.354 | 1.943  |
| LTR:MaLR:ORR1A2-int   | 2093  | 0.011 | 0.011 | 0.015 | 0.025 | 1.353 | 2.215  |
| LTR:ERVL:LTR79        | 380   | 0.009 | 0.009 | 0.012 | 0.009 | 1.348 | 1.007  |
| LINE:L1:L1MB5         | 3769  | 0.013 | 0.013 | 0.017 | 0.013 | 1.347 | 0.944  |
| LINE:L1:L1MEg         | 4286  | 0.044 | 0.041 | 0.059 | 0.072 | 1.347 | 1.754  |
| LTR:ERVL:LTR33A       | 505   | 0.004 | 0.004 | 0.005 | 0.031 | 1.346 | 7.174  |
| LINE:L1:L1ME2         | 2660  | 0.007 | 0.007 | 0.010 | 0.006 | 1.345 | 0.846  |
| LTR:ERVK:RLTR44C      | 202   | 0.106 | 0.104 | 0.142 | 0.005 | 1.345 | 0.047  |
| LTR:ERVK:MERVK26-int  | 1010  | 0.004 | 0.004 | 0.005 | 0.022 | 1.344 | 5.741  |
| LINE:L1:Lx6           | 29266 | 0.004 | 0.004 | 0.005 | 0.003 | 1.342 | 0.859  |
| LINE:L1:L1_Mur3       | 27264 | 0.004 | 0.004 | 0.005 | 0.004 | 1.337 | 0.844  |
| LTR:ERVK:RLTR10E      | 688   | 0.063 | 0.070 | 0.084 | 0.025 | 1.337 | 0.355  |
| LTR:ERVL:MLT2B4       | 1871  | 0.004 | 0.004 | 0.006 | 0.006 | 1.336 | 1.564  |
| LINE:L1:Lx5           | 28509 | 0.005 | 0.005 | 0.006 | 0.033 | 1.336 | 6.881  |
| LTR:ERVL:MT2B2        | 3958  | 0.035 | 0.038 | 0.047 | 0.108 | 1.335 | 2.852  |
| LINE:L1:L1MA4         | 7484  | 0.010 | 0.010 | 0.013 | 0.004 | 1.334 | 0.406  |
| LINE:L1:Lx3A          | 8441  | 0.002 | 0.002 | 0.003 | 0.003 | 1.334 | 1.412  |
| LINE:L1:L1MDb         | 573   | 0.029 | 0.029 | 0.039 | 0.006 | 1.331 | 0.216  |
| LTR:ERVK:IAPEY3_LTR   | 983   | 0.007 | 0.006 | 0.009 | 0.004 | 1.331 | 0.666  |
| LINE:L1:L1MDa         | 3489  | 0.008 | 0.008 | 0.010 | 0.005 | 1.328 | 0.603  |
| LINE:L1:L1MB3         | 5357  | 0.015 | 0.016 | 0.020 | 0.011 | 1.327 | 0.647  |
| LINE:L1:L1M7          | 261   | 0.008 | 0.007 | 0.010 | 0.016 | 1.326 | 2.351  |
| LTR:Gypsy?:LTR88b     | 180   | 0.009 | 0.006 | 0.011 | 0.015 | 1.323 | 2.286  |
| LTR:ERVL:MLT2B2       | 1340  | 0.006 | 0.007 | 0.007 | 0.003 | 1.323 | 0.423  |
| LTR:ERV1:RMER5        | 7415  | 0.009 | 0.008 | 0.012 | 0.015 | 1.322 | 1.737  |
| LINE:L1:Lx9           | 56621 | 0.005 | 0.005 | 0.006 | 0.004 | 1.321 | 0.825  |
| LTR:ERVL:RMER15       | 17921 | 0.014 | 0.015 | 0.019 | 0.037 | 1.319 | 2.430  |
| LTR:ERVL?:LTR89       | 141   | 0.027 | 0.029 | 0.035 | 0.032 | 1.319 | 1.120  |

|                       |        |       |       |       |       |       |       |
|-----------------------|--------|-------|-------|-------|-------|-------|-------|
| LTR:ERVK:RLTR18B      | 2369   | 0.009 | 0.010 | 0.011 | 0.024 | 1.319 | 2.372 |
| LTR:ERV1:RLTR6-int    | 1414   | 0.010 | 0.011 | 0.013 | 0.027 | 1.317 | 2.476 |
| SINE:Alu:B1_Mur2      | 31802  | 0.069 | 0.071 | 0.090 | 0.090 | 1.317 | 1.274 |
| LTR:ERV1:RLTR14       | 2809   | 0.009 | 0.009 | 0.011 | 0.008 | 1.316 | 0.980 |
| LTR:ERVK:IAPLTR2b     | 1086   | 0.006 | 0.007 | 0.008 | 0.008 | 1.316 | 1.248 |
| LTR:Gypsy:MamGypLTR2c | 115    | 0.002 | 0.002 | 0.002 | 0.009 | 1.314 | 4.616 |
| LINE:L1:Lx2A1         | 2716   | 0.002 | 0.002 | 0.002 | 0.002 | 1.313 | 0.918 |
| LTR:ERVK:RMER17D2     | 1734   | 0.003 | 0.003 | 0.004 | 0.007 | 1.312 | 2.187 |
| LTR:ERVK:RLTR13B4     | 380    | 0.003 | 0.003 | 0.004 | 0.005 | 1.311 | 1.738 |
| SINE:B2:B2_Mm2        | 89635  | 0.043 | 0.055 | 0.056 | 0.082 | 1.310 | 1.473 |
| LINE:L1:L1MC3         | 5330   | 0.007 | 0.007 | 0.010 | 0.004 | 1.303 | 0.597 |
| LTR:ERVK:RMER12B      | 1038   | 0.011 | 0.013 | 0.015 | 0.009 | 1.302 | 0.660 |
| LTR:ERVK:RLTR40       | 2658   | 0.008 | 0.008 | 0.010 | 0.008 | 1.302 | 0.946 |
| LTR:ERVL:RLTR28       | 2016   | 0.014 | 0.014 | 0.018 | 0.019 | 1.301 | 1.358 |
| LINE:L1:Lx4B          | 11010  | 0.005 | 0.005 | 0.007 | 0.002 | 1.299 | 0.367 |
| LINE:L1:L1VL2         | 4520   | 0.006 | 0.006 | 0.007 | 0.009 | 1.296 | 1.610 |
| LTR:MaLR:ORR1E        | 28160  | 0.009 | 0.010 | 0.012 | 0.012 | 1.295 | 1.304 |
| LTR:ERVL:RMER10B      | 3328   | 0.020 | 0.020 | 0.026 | 0.028 | 1.293 | 1.377 |
| LTR:ERVL:MLT2B3       | 1502   | 0.004 | 0.004 | 0.005 | 0.004 | 1.293 | 0.971 |
| LTR:ERVK:RLTR12B      | 2939   | 0.068 | 0.068 | 0.088 | 0.057 | 1.292 | 0.834 |
| LTR:ERVK:IAPEY3-int   | 2324   | 0.004 | 0.004 | 0.005 | 0.007 | 1.291 | 1.899 |
| LINE:L2:L2c           | 11803  | 0.051 | 0.056 | 0.066 | 0.105 | 1.291 | 1.867 |
| LTR:ERVK:RLTR13D3     | 801    | 0.004 | 0.004 | 0.005 | 0.004 | 1.290 | 1.176 |
| LINE:L1:L1_Mm         | 15845  | 0.003 | 0.004 | 0.004 | 0.006 | 1.286 | 1.593 |
| LINE:L1:L1M3          | 7083   | 0.008 | 0.008 | 0.010 | 0.006 | 1.285 | 0.765 |
| LINE:L1:Lx            | 24366  | 0.004 | 0.004 | 0.005 | 0.005 | 1.284 | 1.216 |
| LTR:MaLR:ORR1B1-int   | 2996   | 0.025 | 0.025 | 0.032 | 0.036 | 1.282 | 1.413 |
| SINE:B4:RSINE1        | 115483 | 0.037 | 0.038 | 0.047 | 0.060 | 1.282 | 1.585 |
| LTR:ERVK:RLTR20D      | 1449   | 0.019 | 0.018 | 0.025 | 0.005 | 1.280 | 0.302 |
| LTR:MaLR:ORR1E-int    | 1588   | 0.007 | 0.006 | 0.009 | 0.008 | 1.279 | 1.179 |
| LINE:L1:L1MD1         | 2300   | 0.004 | 0.003 | 0.005 | 0.003 | 1.279 | 0.883 |
| LTR:ERVK:RMER17A-int  | 408    | 0.004 | 0.005 | 0.006 | 0.022 | 1.277 | 4.467 |

|                      |       |       |       |       |       |       |       |
|----------------------|-------|-------|-------|-------|-------|-------|-------|
| LINE:L1:L1MC5        | 2621  | 0.016 | 0.016 | 0.020 | 0.015 | 1.277 | 0.916 |
| LINE:L1:Lx2          | 18182 | 0.004 | 0.004 | 0.005 | 0.004 | 1.273 | 0.925 |
| LTR:ERVK:RLTR20A2    | 888   | 0.012 | 0.013 | 0.015 | 0.004 | 1.273 | 0.315 |
| LINE:L1:L1MD2        | 3224  | 0.027 | 0.029 | 0.035 | 0.016 | 1.272 | 0.562 |
| LINE:L1:Lx8          | 65407 | 0.007 | 0.007 | 0.008 | 0.006 | 1.267 | 0.882 |
| LINE:L1:L1PB4        | 143   | 0.004 | 0.003 | 0.004 | 0.001 | 1.266 | 0.263 |
| LINE:L1:L1MB8        | 6004  | 0.013 | 0.013 | 0.017 | 0.007 | 1.265 | 0.552 |
| LTR:ERVL:MLT2E       | 126   | 0.006 | 0.006 | 0.007 | 0.009 | 1.265 | 1.618 |
| LINE:L1:L1ME2z       | 1528  | 0.010 | 0.011 | 0.013 | 0.005 | 1.264 | 0.438 |
| SINE:Alu:B1_Mus1     | 93733 | 0.057 | 0.060 | 0.072 | 0.083 | 1.263 | 1.378 |
| LINE:L1:HAL1b        | 508   | 0.015 | 0.016 | 0.019 | 0.010 | 1.263 | 0.601 |
| LINE:L1:L1MEc        | 5386  | 0.005 | 0.006 | 0.007 | 0.004 | 1.261 | 0.674 |
| SINE:B2:B3A          | 92388 | 0.031 | 0.033 | 0.039 | 0.049 | 1.261 | 1.504 |
| LTR:ERVL:ERVL-B4-int | 1421  | 0.005 | 0.005 | 0.006 | 0.026 | 1.260 | 5.646 |
| LTR:ERV1:MER65D      | 106   | 0.008 | 0.007 | 0.010 | 0.006 | 1.259 | 0.876 |
| LINE:L1:L1MC4        | 6020  | 0.013 | 0.013 | 0.017 | 0.008 | 1.258 | 0.631 |
| LTR:MaLR:MLT1A0      | 10496 | 0.007 | 0.007 | 0.009 | 0.008 | 1.255 | 1.132 |
| SINE:ID:ID           | 7858  | 0.044 | 0.045 | 0.056 | 0.050 | 1.255 | 1.127 |
| LTR:ERVL:MER54B      | 116   | 0.020 | 0.025 | 0.025 | 0.041 | 1.255 | 1.605 |
| LINE:L1:L1MB7        | 6940  | 0.028 | 0.029 | 0.035 | 0.008 | 1.250 | 0.263 |
| SINE:Alu:B1F1        | 20755 | 0.095 | 0.100 | 0.118 | 0.094 | 1.247 | 0.935 |
| LTR:ERVK:SRV_MM-int  | 243   | 0.107 | 0.105 | 0.133 | 0.144 | 1.243 | 1.374 |
| LINE:L1:L1M4         | 12388 | 0.015 | 0.016 | 0.018 | 0.011 | 1.243 | 0.725 |
| LINE:L1:L1MC1        | 5619  | 0.006 | 0.007 | 0.008 | 0.005 | 1.241 | 0.803 |
| SINE:Alu:B1_Mus2     | 70597 | 0.069 | 0.073 | 0.086 | 0.111 | 1.240 | 1.517 |
| LINE:L1:HAL1-3A_ME   | 6749  | 0.058 | 0.064 | 0.071 | 0.079 | 1.238 | 1.244 |
| LTR:ERVK:RMER13A     | 2926  | 0.007 | 0.007 | 0.009 | 0.013 | 1.236 | 1.882 |
| LINE:L1:L1Md_F       | 5937  | 0.002 | 0.003 | 0.003 | 0.010 | 1.236 | 4.023 |
| LINE:L2:L2a          | 23161 | 0.036 | 0.037 | 0.044 | 0.049 | 1.236 | 1.344 |
| LTR:MaLR:MTE2a       | 15455 | 0.020 | 0.021 | 0.025 | 0.028 | 1.233 | 1.289 |
| LTR:MaLR:MTE2b       | 14490 | 0.011 | 0.012 | 0.013 | 0.011 | 1.231 | 0.989 |
| SINE:Alu:B1_Mur4     | 40539 | 0.054 | 0.057 | 0.066 | 0.063 | 1.231 | 1.104 |



|                     |        |       |       |       |       |       |       |
|---------------------|--------|-------|-------|-------|-------|-------|-------|
| LTR:ERV1:MER21-int  | 110    | 0.012 | 0.013 | 0.015 | 0.004 | 1.231 | 0.313 |
| LTR:ERVK:RLTR10B    | 478    | 0.009 | 0.009 | 0.011 | 0.017 | 1.228 | 1.865 |
| LTR:MaLR:ORR1D2     | 15360  | 0.010 | 0.010 | 0.012 | 0.011 | 1.228 | 1.046 |
| LINE:L1:L1_Mus1     | 27653  | 0.006 | 0.006 | 0.007 | 0.025 | 1.228 | 4.190 |
| LTR:ERVK:RLTR11A    | 3041   | 0.018 | 0.018 | 0.022 | 0.017 | 1.227 | 0.946 |
| LTR:ERVK:RMER6A     | 3987   | 0.023 | 0.025 | 0.028 | 0.021 | 1.224 | 0.839 |
| LTR:ERVK:RLTR10     | 2929   | 0.009 | 0.009 | 0.011 | 0.007 | 1.224 | 0.792 |
| LTR:ERVK:RMER19A    | 2200   | 0.009 | 0.009 | 0.011 | 0.012 | 1.222 | 1.366 |
| LTR:MaLR:ORR1B2-int | 865    | 0.006 | 0.006 | 0.007 | 0.004 | 1.219 | 0.713 |
| LTR:ERVK:IAPLTR3    | 664    | 0.003 | 0.002 | 0.004 | 0.002 | 1.217 | 0.904 |
| SINE:Alu:B1_Mm      | 42397  | 0.062 | 0.064 | 0.075 | 0.117 | 1.214 | 1.827 |
| LINE:L1:L1ME3A      | 2329   | 0.008 | 0.008 | 0.009 | 0.006 | 1.213 | 0.688 |
| LTR:MaLR:MTC-int    | 3550   | 0.016 | 0.015 | 0.019 | 0.014 | 1.213 | 0.909 |
| LINE:L1:L1M4b       | 2759   | 0.013 | 0.014 | 0.016 | 0.009 | 1.212 | 0.662 |
| LINE:L1:L1_Mus3     | 24126  | 0.005 | 0.004 | 0.006 | 0.006 | 1.211 | 1.442 |
| LINE:L1:L1ME5       | 145    | 0.021 | 0.023 | 0.026 | 0.002 | 1.208 | 0.091 |
| LTR:ERVK:RLTR11B    | 1983   | 0.030 | 0.029 | 0.036 | 0.029 | 1.208 | 1.015 |
| LTR:MaLR:ORR1C1-int | 783    | 0.031 | 0.030 | 0.038 | 0.036 | 1.207 | 1.213 |
| LTR:MaLR:MTE-int    | 5136   | 0.013 | 0.013 | 0.015 | 0.015 | 1.205 | 1.125 |
| LTR:ERVL:HERV16-int | 438    | 0.009 | 0.008 | 0.011 | 0.002 | 1.205 | 0.217 |
| LTR:ERV1:RLTR41     | 1911   | 0.012 | 0.012 | 0.014 | 0.026 | 1.204 | 2.119 |
| LTR:ERVK:RLTR15     | 5513   | 0.032 | 0.034 | 0.039 | 0.029 | 1.203 | 0.845 |
| LTR:ERV1:LTR48      | 648    | 0.005 | 0.005 | 0.007 | 0.011 | 1.201 | 1.978 |
| LINE:L1:L1MC2       | 2203   | 0.017 | 0.019 | 0.021 | 0.004 | 1.201 | 0.218 |
| SINE:Alu:B1F2       | 16782  | 0.078 | 0.082 | 0.094 | 0.057 | 1.199 | 0.692 |
| LTR:MaLR:MTD-int    | 2482   | 0.013 | 0.014 | 0.015 | 0.012 | 1.199 | 0.827 |
| SINE:B2:B3          | 147277 | 0.036 | 0.039 | 0.043 | 0.044 | 1.199 | 1.143 |
| LTR:ERVL:LTR16E2    | 428    | 0.002 | 0.002 | 0.002 | 0.002 | 1.198 | 0.888 |
| LTR:ERVK:RMER4A     | 3106   | 0.021 | 0.022 | 0.025 | 0.016 | 1.197 | 0.739 |
| LTR:ERVK:RLTR25A    | 3222   | 0.010 | 0.010 | 0.012 | 0.029 | 1.194 | 2.856 |
| SINE:Alu:PB1D7      | 24985  | 0.084 | 0.089 | 0.100 | 0.091 | 1.194 | 1.024 |
| LTR:MaLR:MLT1B-int  | 164    | 0.022 | 0.020 | 0.026 | 0.003 | 1.194 | 0.135 |

|                     |        |       |       |       |       |       |       |
|---------------------|--------|-------|-------|-------|-------|-------|-------|
| LTR:MaLR:ORR1A1-int | 856    | 0.015 | 0.015 | 0.018 | 0.028 | 1.193 | 1.879 |
| SINE:ID:ID4_        | 26405  | 0.078 | 0.078 | 0.093 | 0.073 | 1.191 | 0.942 |
| LTR:MaLR:MLT1N2     | 727    | 0.007 | 0.007 | 0.009 | 0.010 | 1.190 | 1.421 |
| LTR:ERVK:MYSERV-int | 1447   | 0.009 | 0.010 | 0.011 | 0.012 | 1.190 | 1.212 |
| SINE:Alu:B1_Mur1    | 37980  | 0.062 | 0.067 | 0.074 | 0.068 | 1.189 | 1.025 |
| LTR:ERVK:RLTR12A    | 971    | 0.008 | 0.008 | 0.009 | 0.005 | 1.188 | 0.580 |
| SINE:B4:ID_B1       | 111246 | 0.061 | 0.064 | 0.073 | 0.068 | 1.188 | 1.057 |
| LTR:MaLR:ORR1A4-int | 1316   | 0.067 | 0.069 | 0.079 | 0.090 | 1.187 | 1.308 |
| LTR:ERVL:MLT2B1     | 1656   | 0.004 | 0.004 | 0.004 | 0.004 | 1.185 | 1.170 |
| LINE:L1:L1VL1       | 2852   | 0.004 | 0.004 | 0.004 | 0.008 | 1.184 | 2.059 |
| LTR:ERVK:RLTR20A    | 1090   | 0.013 | 0.012 | 0.015 | 0.006 | 1.184 | 0.513 |
| LTR:ERVL:LTR83      | 161    | 0.096 | 0.092 | 0.114 | 0.002 | 1.183 | 0.021 |
| SINE:Alu:B1_Mur3    | 24658  | 0.072 | 0.076 | 0.085 | 0.091 | 1.183 | 1.197 |
| LTR:ERVK:RLTR11A2   | 3350   | 0.012 | 0.012 | 0.015 | 0.014 | 1.182 | 1.137 |
| LTR:MaLR:MTB-int    | 591    | 0.287 | 0.275 | 0.339 | 0.018 | 1.180 | 0.065 |
| LTR:MaLR:ORR1C2     | 11826  | 0.018 | 0.019 | 0.021 | 0.016 | 1.179 | 0.823 |
| LTR:ERVL:LTR41      | 512    | 0.009 | 0.010 | 0.010 | 0.015 | 1.176 | 1.455 |
| LINE:L1:L1MA9       | 4608   | 0.004 | 0.004 | 0.005 | 0.004 | 1.175 | 0.957 |
| LTR:ERV1:MER57E1    | 166    | 0.004 | 0.004 | 0.004 | 0.001 | 1.175 | 0.354 |
| LTR:ERVK:ETnERV-int | 404    | 0.044 | 0.049 | 0.052 | 0.120 | 1.173 | 2.475 |
| LINE:L1:L1MEd       | 1051   | 0.011 | 0.011 | 0.013 | 0.003 | 1.168 | 0.316 |
| LTR:ERVK:RLTR22_Mur | 3625   | 0.010 | 0.010 | 0.011 | 0.008 | 1.167 | 0.815 |
| LTR:MaLR:MTC        | 26761  | 0.013 | 0.014 | 0.016 | 0.015 | 1.166 | 1.086 |
| LTR:MaLR:MTEb       | 12207  | 0.009 | 0.010 | 0.011 | 0.017 | 1.164 | 1.805 |
| LTR:ERVL:LTR80A     | 110    | 0.002 | 0.001 | 0.003 | 0.001 | 1.163 | 1.066 |
| LTR:ERV1:MER90      | 250    | 0.004 | 0.005 | 0.004 | 0.007 | 1.161 | 1.377 |
| LTR:ERVL:LTR16B     | 273    | 0.014 | 0.011 | 0.016 | 0.012 | 1.160 | 1.129 |
| LTR:ERVL:LTR33      | 1459   | 0.005 | 0.006 | 0.006 | 0.005 | 1.159 | 0.874 |
| LTR:MaLR:MLT1J1     | 1131   | 0.006 | 0.007 | 0.006 | 0.006 | 1.157 | 0.884 |
| LTR:ERVL:LTR41B     | 286    | 0.012 | 0.016 | 0.014 | 0.084 | 1.157 | 5.364 |
| LTR:MaLR:ORR1C2-int | 908    | 0.018 | 0.018 | 0.021 | 0.017 | 1.157 | 0.918 |
| SINE:Alu:PB1D10     | 72983  | 0.072 | 0.075 | 0.083 | 0.084 | 1.154 | 1.117 |

|                      |       |       |       |       |       |       |       |
|----------------------|-------|-------|-------|-------|-------|-------|-------|
| SINE:B4:B4           | 63984 | 0.021 | 0.021 | 0.024 | 0.030 | 1.154 | 1.408 |
| LTR:ERV1:LTRIS5      | 268   | 0.015 | 0.014 | 0.017 | 0.015 | 1.153 | 1.070 |
| LTR:ERVK:RLTR16      | 2360  | 0.014 | 0.015 | 0.016 | 0.008 | 1.153 | 0.544 |
| LTR:ERVL:MT2B        | 16606 | 0.038 | 0.040 | 0.043 | 0.051 | 1.150 | 1.261 |
| LTR:ERVL:MER68       | 818   | 0.033 | 0.034 | 0.038 | 0.065 | 1.150 | 1.925 |
| LTR:MaLR:ORR1A2      | 14647 | 0.016 | 0.016 | 0.018 | 0.025 | 1.149 | 1.526 |
| LTR:ERVK:RLTR17      | 2701  | 0.016 | 0.015 | 0.019 | 0.023 | 1.149 | 1.536 |
| LTR:ERVK:IAPLTR2a    | 983   | 0.015 | 0.014 | 0.017 | 0.011 | 1.140 | 0.749 |
| SINE:Alu:PB1D9       | 29287 | 0.120 | 0.125 | 0.137 | 0.159 | 1.140 | 1.273 |
| LTR:ERVK:RMER17C-int | 1926  | 0.009 | 0.009 | 0.010 | 0.013 | 1.136 | 1.440 |
| LINE:L2:L2b          | 12890 | 0.045 | 0.046 | 0.052 | 0.053 | 1.135 | 1.166 |
| LTR:ERVK:RMER17A2    | 2297  | 0.024 | 0.026 | 0.028 | 0.026 | 1.132 | 1.009 |
| LTR:ERVK:RMER12      | 5715  | 0.012 | 0.013 | 0.014 | 0.010 | 1.132 | 0.796 |
| LTR:ERV1:MER31-int   | 231   | 0.017 | 0.015 | 0.020 | 0.015 | 1.131 | 1.003 |
| LTR:ERVK:BGLII_B     | 1775  | 0.015 | 0.015 | 0.017 | 0.008 | 1.130 | 0.529 |
| LINE:RTE:L5          | 122   | 0.002 | 0.003 | 0.002 | 0.005 | 1.129 | 1.609 |
| SINE:Alu:PB1         | 13667 | 0.072 | 0.076 | 0.082 | 0.085 | 1.129 | 1.117 |
| SINE:MIR:MIR3        | 9048  | 0.037 | 0.036 | 0.042 | 0.055 | 1.128 | 1.522 |
| SINE:MIR:MIRb        | 39832 | 0.052 | 0.056 | 0.059 | 0.069 | 1.125 | 1.222 |
| LTR:ERVK:RLTR10-int  | 2708  | 0.010 | 0.009 | 0.011 | 0.010 | 1.125 | 1.067 |
| LTR:ERVL:RMER10A     | 4456  | 0.020 | 0.019 | 0.022 | 0.052 | 1.125 | 2.679 |
| LTR:MaLR:ORR1A4      | 7769  | 0.037 | 0.038 | 0.041 | 0.042 | 1.124 | 1.099 |
| LTR:MaLR:MLT1E2      | 1833  | 0.009 | 0.011 | 0.011 | 0.008 | 1.124 | 0.720 |
| LINE:L1:L1MA5A       | 1241  | 0.009 | 0.008 | 0.010 | 0.007 | 1.122 | 0.839 |
| LTR:MaLR:ORR1B1      | 16289 | 0.020 | 0.021 | 0.023 | 0.021 | 1.122 | 1.014 |
| LTR:MaLR:ORR1D1      | 21222 | 0.017 | 0.016 | 0.019 | 0.013 | 1.121 | 0.803 |
| LTR:ERV1:LTRIS_Mm    | 567   | 0.015 | 0.014 | 0.017 | 0.022 | 1.119 | 1.628 |
| LTR:MaLR:MLT1B       | 9348  | 0.015 | 0.015 | 0.016 | 0.012 | 1.118 | 0.779 |
| LTR:ERVL:LTR40c      | 245   | 0.010 | 0.010 | 0.012 | 0.004 | 1.116 | 0.396 |
| LINE:L1:L1MA10       | 886   | 0.003 | 0.003 | 0.003 | 0.003 | 1.116 | 1.122 |
| LTR:ERVL:LTR82A      | 339   | 0.006 | 0.008 | 0.007 | 0.005 | 1.114 | 0.601 |
| LTR:ERVK:RMER19B     | 5926  | 0.022 | 0.023 | 0.024 | 0.020 | 1.110 | 0.895 |

|                      |        |       |       |       |       |       |       |
|----------------------|--------|-------|-------|-------|-------|-------|-------|
| LTR:MaLR:MLT1I       | 1793   | 0.004 | 0.004 | 0.005 | 0.006 | 1.109 | 1.814 |
| LINE:L1:L1ME1        | 5235   | 0.027 | 0.028 | 0.030 | 0.010 | 1.108 | 0.344 |
| LTR:ERVK:RLTR27      | 1637   | 0.006 | 0.006 | 0.006 | 0.011 | 1.106 | 2.003 |
| LTR:ERV1:RLTR24      | 1442   | 0.013 | 0.014 | 0.014 | 0.014 | 1.104 | 1.038 |
| LTR:Gypsy?:LTR85b    | 109    | 0.004 | 0.002 | 0.004 | 0.007 | 1.101 | 3.823 |
| LINE:L1:L1M3b        | 164    | 0.001 | 0.001 | 0.001 | 0.000 | 1.099 | 0.402 |
| LTR:ERVK:RLTR46      | 592    | 0.026 | 0.027 | 0.028 | 0.023 | 1.095 | 0.833 |
| LTR:ERVK:RMER19C     | 4682   | 0.008 | 0.008 | 0.009 | 0.008 | 1.093 | 1.005 |
| SINE:Alu:B1F         | 45775  | 0.063 | 0.065 | 0.069 | 0.073 | 1.092 | 1.108 |
| LTR:MaLR:MLT1H       | 2326   | 0.009 | 0.009 | 0.009 | 0.005 | 1.092 | 0.540 |
| LINE:RTE:L4          | 4028   | 0.145 | 0.139 | 0.158 | 0.227 | 1.091 | 1.633 |
| LTR:ERV1:MER57D      | 300    | 0.002 | 0.002 | 0.002 | 0.003 | 1.090 | 1.977 |
| LINE:L1:L1MC         | 6484   | 0.009 | 0.009 | 0.010 | 0.006 | 1.089 | 0.679 |
| LTR:MaLR:MLT1A0-int  | 208    | 0.006 | 0.005 | 0.006 | 0.014 | 1.089 | 2.946 |
| SINE:B4:B4A          | 106408 | 0.025 | 0.026 | 0.027 | 0.030 | 1.088 | 1.161 |
| LTR:MaLR:MLT1F2      | 2292   | 0.011 | 0.011 | 0.012 | 0.008 | 1.085 | 0.712 |
| LTR:MaLR:MTD         | 50109  | 0.014 | 0.015 | 0.016 | 0.014 | 1.084 | 0.894 |
| LTR:ERVK:RLTR42      | 264    | 0.023 | 0.025 | 0.025 | 0.035 | 1.084 | 1.391 |
| LTR:ERVL:LTR16C      | 1365   | 0.003 | 0.004 | 0.004 | 0.014 | 1.083 | 3.996 |
| LTR:ERVK:IAPLTR3-int | 1395   | 0.002 | 0.002 | 0.002 | 0.002 | 1.083 | 0.992 |
| LTR:ERVK:RMER17B     | 3780   | 0.006 | 0.006 | 0.007 | 0.007 | 1.082 | 1.191 |
| LTR:MaLR:ORR1A3      | 4389   | 0.016 | 0.016 | 0.017 | 0.028 | 1.080 | 1.738 |
| LTR:MaLR:ORR1D1-int  | 1734   | 0.030 | 0.028 | 0.033 | 0.006 | 1.079 | 0.213 |
| LINE:L2:L2           | 17627  | 0.030 | 0.030 | 0.033 | 0.034 | 1.079 | 1.127 |
| LTR:MaLR:MLT1A1-int  | 138    | 0.011 | 0.014 | 0.012 | 0.007 | 1.077 | 0.455 |
| LTR:ERV1:MER67B      | 224    | 0.007 | 0.009 | 0.008 | 0.006 | 1.076 | 0.700 |
| LINE:L1:L1MC4a       | 3655   | 0.030 | 0.030 | 0.032 | 0.014 | 1.075 | 0.475 |
| LTR:MaLR:MTA_Mm-int  | 3024   | 0.039 | 0.043 | 0.042 | 0.058 | 1.074 | 1.335 |
| LTR:ERV1:LTRIS4      | 323    | 0.037 | 0.034 | 0.039 | 0.043 | 1.071 | 1.261 |
| LTR:ERVK:ETnERV2-int | 5884   | 0.026 | 0.027 | 0.027 | 0.065 | 1.069 | 2.415 |
| LTR:ERVK:RLTR10A     | 1205   | 0.010 | 0.007 | 0.010 | 0.013 | 1.069 | 1.724 |
| LTR:MaLR:MLT1A1      | 9356   | 0.008 | 0.009 | 0.009 | 0.006 | 1.069 | 0.649 |

|                     |       |       |       |       |       |       |       |
|---------------------|-------|-------|-------|-------|-------|-------|-------|
| SINE:B2:B2_Mm1t     | 23118 | 0.208 | 0.324 | 0.222 | 0.416 | 1.069 | 1.283 |
| LINE:L1:L1MD3       | 2484  | 0.008 | 0.008 | 0.009 | 0.006 | 1.068 | 0.790 |
| LTR:ERVK:RLTR19C    | 425   | 0.013 | 0.013 | 0.014 | 0.009 | 1.066 | 0.673 |
| LTR:MaLR:MTA_Mm     | 15531 | 0.020 | 0.021 | 0.021 | 0.024 | 1.065 | 1.127 |
| LTR:MaLR:MLT1J      | 2938  | 0.010 | 0.009 | 0.011 | 0.008 | 1.065 | 0.907 |
| LTR:MaLR:ORR1C1     | 7464  | 0.019 | 0.019 | 0.020 | 0.014 | 1.064 | 0.712 |
| LTR:MaLR:ORR1A0     | 2140  | 0.035 | 0.036 | 0.037 | 0.098 | 1.064 | 2.745 |
| LTR:MaLR:MTEa       | 21182 | 0.011 | 0.011 | 0.012 | 0.012 | 1.060 | 1.097 |
| SINE:MIR:MIR        | 42945 | 0.026 | 0.027 | 0.027 | 0.034 | 1.055 | 1.281 |
| LTR:MaLR:ORR1B2     | 8305  | 0.016 | 0.017 | 0.017 | 0.019 | 1.054 | 1.152 |
| LTR:MaLR:ORR1A1     | 4255  | 0.026 | 0.029 | 0.028 | 0.028 | 1.051 | 0.972 |
| LTR:MaLR:MLT1G3     | 1067  | 0.012 | 0.011 | 0.013 | 0.029 | 1.050 | 2.525 |
| LTR:ERV1:LTR73      | 155   | 0.008 | 0.008 | 0.008 | 0.013 | 1.050 | 1.642 |
| LTR:ERVL:MLT2B5     | 446   | 0.191 | 0.208 | 0.200 | 0.203 | 1.048 | 0.977 |
| LTR:ERV1?:LTR81A    | 177   | 0.003 | 0.003 | 0.003 | 0.004 | 1.044 | 1.335 |
| LINE:L1:L1MEa       | 167   | 0.004 | 0.004 | 0.004 | 0.009 | 1.044 | 2.340 |
| LTR:ERVK:IAPEY2_LTR | 1063  | 0.003 | 0.003 | 0.003 | 0.007 | 1.039 | 2.658 |
| LTR:ERVK:RMER4B     | 5082  | 0.046 | 0.048 | 0.048 | 0.028 | 1.038 | 0.589 |
| LTR:MaLR:MTB        | 6393  | 0.049 | 0.047 | 0.050 | 0.017 | 1.037 | 0.362 |
| LTR:MaLR:MLT1-int   | 271   | 0.003 | 0.004 | 0.003 | 0.008 | 1.034 | 2.096 |
| LTR:ERV1:RLTR1      | 306   | 0.105 | 0.103 | 0.108 | 0.118 | 1.034 | 1.140 |
| LTR:MaLR:MLT1D      | 8382  | 0.017 | 0.017 | 0.017 | 0.018 | 1.033 | 1.041 |
| LTR:ERVL?:LTR87     | 211   | 0.037 | 0.033 | 0.038 | 0.017 | 1.032 | 0.504 |
| LINE:L1:L1M2a       | 211   | 0.013 | 0.012 | 0.013 | 0.003 | 1.031 | 0.223 |
| LTR:ERVK:RLTR9F     | 404   | 0.004 | 0.003 | 0.004 | 0.004 | 1.030 | 1.529 |
| SINE:MIR:MIRm       | 8661  | 0.042 | 0.042 | 0.044 | 0.059 | 1.029 | 1.413 |
| LTR:ERV1:RLTR30     | 389   | 0.017 | 0.014 | 0.018 | 0.023 | 1.028 | 1.720 |
| LTR:ERVL:LTR16A1    | 778   | 0.001 | 0.001 | 0.001 | 0.003 | 1.027 | 2.600 |
| SINE:MIR:MIRc       | 21284 | 0.089 | 0.090 | 0.091 | 0.084 | 1.027 | 0.936 |
| LTR:ERVK:RLTR18     | 1844  | 0.064 | 0.066 | 0.066 | 0.165 | 1.025 | 2.523 |
| LINE:L1:L1M3c       | 338   | 0.003 | 0.004 | 0.003 | 0.003 | 1.023 | 0.855 |
| LTR:ERVK:RLTR9C     | 792   | 0.031 | 0.031 | 0.032 | 0.043 | 1.022 | 1.390 |

|                            |       |       |       |       |       |       |       |
|----------------------------|-------|-------|-------|-------|-------|-------|-------|
| SINE:ID:ID4                | 23957 | 0.091 | 0.094 | 0.093 | 0.082 | 1.021 | 0.872 |
| LTR:ERV1:LTR37B            | 380   | 0.008 | 0.006 | 0.008 | 0.001 | 1.020 | 0.234 |
| LTR:ERVK:IAPLTR4           | 562   | 0.009 | 0.009 | 0.009 | 0.011 | 1.019 | 1.284 |
| LTR:ERVK:RLTR20B1          | 807   | 0.023 | 0.025 | 0.023 | 0.016 | 1.019 | 0.636 |
| LTR:Gypsy:MamGypLTR2b      | 111   | 0.006 | 0.004 | 0.006 | 0.007 | 1.016 | 1.853 |
| LTR:ERVK:MMETn-int         | 1965  | 0.406 | 0.474 | 0.413 | 0.761 | 1.016 | 1.606 |
| Low_complexity:ERVL:LTR82B | 320   | 0.002 | 0.002 | 0.002 | 0.005 | 1.016 | 2.165 |
| LTR:ERVL:MT2A              | 14256 | 0.024 | 0.026 | 0.025 | 0.015 | 1.015 | 0.560 |
| LTR:MaLR:MLT-int           | 849   | 0.036 | 0.034 | 0.037 | 0.014 | 1.012 | 0.417 |
| LTR:ERVK:RLTR13D1          | 755   | 0.010 | 0.010 | 0.010 | 0.009 | 1.011 | 0.901 |
| LTR:ERVL:ERVL-int          | 745   | 0.003 | 0.002 | 0.003 | 0.003 | 1.007 | 1.493 |
| SINE:B2:B2_Mm1a            | 18354 | 0.407 | 0.634 | 0.409 | 0.859 | 1.006 | 1.355 |
| LTR:ERVL:RMER15-int        | 3115  | 0.015 | 0.016 | 0.015 | 0.011 | 1.003 | 0.721 |
| LINE:L1:L1MA8              | 3839  | 0.020 | 0.021 | 0.020 | 0.011 | 0.999 | 0.506 |
| SINE:ID:ID2                | 5637  | 0.115 | 0.118 | 0.115 | 0.087 | 0.998 | 0.742 |
| LTR:ERV1:MER31B            | 552   | 0.013 | 0.015 | 0.013 | 0.010 | 0.990 | 0.645 |
| LTR:ERVK:RLTR31B_Mm        | 417   | 0.017 | 0.018 | 0.017 | 0.005 | 0.989 | 0.249 |
| LTR:ERVK:BGLII             | 2271  | 0.014 | 0.012 | 0.014 | 0.018 | 0.986 | 1.410 |
| LTR:ERV1:MER90a            | 569   | 0.010 | 0.011 | 0.009 | 0.005 | 0.981 | 0.483 |
| LTR:ERVK:RLTR31A_Mm        | 1012  | 0.013 | 0.011 | 0.012 | 0.013 | 0.981 | 1.203 |
| LTR:MaLR:MTE2a-int         | 684   | 0.007 | 0.006 | 0.007 | 0.035 | 0.979 | 5.971 |
| SINE:Alu:FAM               | 215   | 0.162 | 0.176 | 0.158 | 0.099 | 0.975 | 0.564 |
| LTR:ERVK:IAPLTR2_Mm        | 2285  | 0.014 | 0.014 | 0.013 | 0.012 | 0.975 | 0.839 |
| LINE:L1:HAL1               | 3825  | 0.024 | 0.022 | 0.023 | 0.112 | 0.973 | 4.970 |
| LTR:ERVL:MLT2C2            | 653   | 0.006 | 0.005 | 0.006 | 0.007 | 0.972 | 1.217 |
| LTR:ERV:LTR55              | 150   | 0.007 | 0.005 | 0.007 | 0.007 | 0.971 | 1.343 |
| LINE:CR1:L3                | 9768  | 0.102 | 0.107 | 0.099 | 0.100 | 0.969 | 0.937 |
| LTR:MaLR:MLT1J2            | 1102  | 0.008 | 0.010 | 0.008 | 0.076 | 0.969 | 7.754 |
| LTR:MaLR:MTB_Mm            | 4860  | 0.016 | 0.016 | 0.016 | 0.011 | 0.967 | 0.698 |
| LTR:ERVK:RLTR19A           | 157   | 0.091 | 0.122 | 0.088 | 0.029 | 0.967 | 0.241 |
| LTR:MaLR:MLT1C             | 7782  | 0.023 | 0.022 | 0.022 | 0.006 | 0.963 | 0.288 |
| LTR:ERVK:RLTRETN_Mm        | 2864  | 0.108 | 0.115 | 0.104 | 0.194 | 0.962 | 1.684 |

|                       |       |       |       |       |       |       |        |
|-----------------------|-------|-------|-------|-------|-------|-------|--------|
| SINE:SINE:LFSINE_Vert | 344   | 0.094 | 0.100 | 0.090 | 0.004 | 0.958 | 0.039  |
| LTR:ERVL:LTR16D       | 178   | 0.021 | 0.020 | 0.020 | 0.013 | 0.956 | 0.627  |
| LINE:L1:Lx2B          | 12773 | 0.006 | 0.006 | 0.006 | 0.009 | 0.955 | 1.440  |
| LTR:ERVK:RLTR9A       | 1791  | 0.016 | 0.017 | 0.015 | 0.020 | 0.953 | 1.172  |
| LINE:L1:L1M2c         | 315   | 0.004 | 0.004 | 0.004 | 0.013 | 0.947 | 3.609  |
| LTR:MaLR:ORR1D-int    | 796   | 0.013 | 0.014 | 0.012 | 0.018 | 0.937 | 1.235  |
| SINE:SINE:AmnSINE1    | 518   | 0.023 | 0.025 | 0.021 | 0.011 | 0.934 | 0.432  |
| LTR:ERV1:LTRIS_Mus    | 879   | 0.042 | 0.043 | 0.039 | 0.092 | 0.931 | 2.170  |
| LTR:Gypsy:MamGypLTR1a | 140   | 0.002 | 0.001 | 0.002 | 0.002 | 0.931 | 1.540  |
| LTR:MaLR:MTB_Mm-int   | 377   | 0.023 | 0.027 | 0.021 | 0.006 | 0.928 | 0.208  |
| LTR:ERV1:RLTR1B       | 1559  | 0.140 | 0.135 | 0.130 | 0.209 | 0.924 | 1.553  |
| LTR:ERVL:LTR16B2      | 384   | 0.004 | 0.004 | 0.003 | 0.003 | 0.923 | 0.944  |
| LTR:ERVL:LTR50        | 549   | 0.250 | 0.250 | 0.231 | 0.158 | 0.923 | 0.632  |
| LTR:ERVL:LTR53        | 273   | 0.004 | 0.003 | 0.004 | 0.004 | 0.914 | 1.560  |
| LTR:ERV1:MER57C2      | 409   | 0.008 | 0.008 | 0.007 | 0.007 | 0.911 | 0.873  |
| LTR:ERVK:RLTR13C1     | 661   | 0.008 | 0.009 | 0.007 | 0.012 | 0.910 | 1.268  |
| LTR:MaLR:MLT1M        | 248   | 0.374 | 0.377 | 0.340 | 0.146 | 0.910 | 0.387  |
| LTR:ERVK:MMTV-int     | 158   | 0.021 | 0.024 | 0.019 | 0.014 | 0.901 | 0.585  |
| SINE:Alu:AluF_3       | 166   | 0.049 | 0.029 | 0.043 | 0.392 | 0.891 | 13.487 |
| LTR:ERVK:RLTR19-int   | 2543  | 0.273 | 0.279 | 0.243 | 0.802 | 0.889 | 2.878  |
| LTR:ERVK:RLTR18-int   | 506   | 0.032 | 0.033 | 0.028 | 0.070 | 0.887 | 2.154  |
| LINE:L1:L1MCc         | 513   | 0.010 | 0.010 | 0.009 | 0.004 | 0.884 | 0.404  |
| LTR:Gypsy:MamGypLTR1c | 148   | 0.004 | 0.003 | 0.003 | 0.001 | 0.881 | 0.246  |
| LTR:ERVK:RLTR20B3     | 2403  | 0.015 | 0.014 | 0.013 | 0.006 | 0.879 | 0.436  |
| LTR:ERV1:MER34        | 750   | 0.009 | 0.008 | 0.008 | 0.009 | 0.875 | 1.156  |
| LTR:ERV1:LTR78        | 588   | 0.018 | 0.015 | 0.015 | 0.005 | 0.875 | 0.309  |
| LTR:MaLR:MLT1F-int    | 417   | 0.022 | 0.018 | 0.019 | 0.004 | 0.873 | 0.212  |
| LTR:ERVK:RLTR20C      | 1408  | 0.027 | 0.027 | 0.024 | 0.019 | 0.872 | 0.701  |
| LTR:ERVL:LTR33B       | 353   | 0.003 | 0.003 | 0.002 | 0.003 | 0.871 | 1.339  |
| LTR:MaLR:ORR1A0-int   | 453   | 0.050 | 0.054 | 0.043 | 0.136 | 0.868 | 2.509  |
| LTR:ERVL:LTR16E1      | 513   | 0.004 | 0.004 | 0.004 | 0.009 | 0.860 | 2.389  |
| LTR:MaLR:MLT1H1       | 992   | 0.007 | 0.008 | 0.006 | 0.006 | 0.851 | 0.831  |

|                       |      |       |       |       |       |       |        |
|-----------------------|------|-------|-------|-------|-------|-------|--------|
| LINE:L1:L1M3e         | 641  | 0.019 | 0.020 | 0.016 | 0.006 | 0.847 | 0.299  |
| LINE:CR1:L3b          | 1705 | 0.034 | 0.033 | 0.029 | 0.044 | 0.843 | 1.338  |
| LTR:ERVL:MER76        | 240  | 0.032 | 0.031 | 0.027 | 0.016 | 0.842 | 0.533  |
| LTR:MaLR:MLT1F        | 1550 | 0.010 | 0.009 | 0.008 | 0.007 | 0.840 | 0.789  |
| LTR:ERVL:MER74A       | 731  | 0.007 | 0.005 | 0.006 | 0.005 | 0.840 | 1.064  |
| LTR:ERVL:LTR33A_      | 475  | 0.016 | 0.015 | 0.013 | 0.009 | 0.823 | 0.588  |
| LTR:ERVL:LTR33C       | 229  | 0.096 | 0.094 | 0.078 | 0.017 | 0.817 | 0.177  |
| LTR:MaLR:MLT1E1A      | 1155 | 0.018 | 0.019 | 0.015 | 0.004 | 0.817 | 0.225  |
| LTR:ERV1:RMER21A      | 632  | 0.096 | 0.097 | 0.078 | 0.069 | 0.815 | 0.715  |
| LTR:ERVL:MER54A       | 276  | 0.008 | 0.007 | 0.006 | 0.014 | 0.814 | 2.115  |
| LTR:ERV1:LTR48B       | 307  | 0.006 | 0.004 | 0.005 | 0.003 | 0.813 | 0.665  |
| LTR:ERVK:BGLII_A      | 308  | 0.015 | 0.014 | 0.012 | 0.014 | 0.785 | 1.029  |
| LTR:ERV1:MMERGLN-int  | 842  | 0.438 | 0.439 | 0.343 | 0.922 | 0.784 | 2.102  |
| LTR:ERV1:RLTR5_Mm     | 439  | 0.006 | 0.006 | 0.005 | 0.005 | 0.747 | 0.911  |
| LTR:ERV1:MER57A-int   | 231  | 0.013 | 0.013 | 0.010 | 0.006 | 0.741 | 0.432  |
| LTR:ERV1?:LTR81C      | 111  | 0.166 | 0.158 | 0.119 | 0.216 | 0.716 | 1.367  |
| LTR:ERVK:RLTR9B2      | 343  | 0.018 | 0.019 | 0.013 | 0.012 | 0.707 | 0.621  |
| LTR:MaLR:MTEb-int     | 659  | 0.007 | 0.007 | 0.005 | 0.007 | 0.684 | 1.053  |
| LTR:ERVL:HERVL40-int  | 206  | 0.130 | 0.130 | 0.089 | 0.093 | 0.681 | 0.715  |
| LTR:ERV1:RLTR14-int   | 1827 | 0.019 | 0.019 | 0.013 | 0.014 | 0.668 | 0.727  |
| LTR:Gypsy:MamGypLTR1d | 111  | 0.001 | 0.001 | 0.000 | 0.013 | 0.663 | 12.079 |
| LTR:ERVL:MER74C       | 117  | 0.002 | 0.001 | 0.002 | 0.002 | 0.660 | 1.475  |
| LTR:ERVL:MER74B       | 326  | 0.005 | 0.004 | 0.003 | 0.009 | 0.634 | 2.234  |
| LINE:L1:HAL1-2a_MD    | 1302 | 0.208 | 0.212 | 0.131 | 0.339 | 0.632 | 1.602  |
| LTR:MaLR:MLT1A-int    | 120  | 0.003 | 0.001 | 0.002 | 0.001 | 0.606 | 0.765  |
| LTR:ERVK:RLTR44E      | 121  | 0.019 | 0.019 | 0.011 | 0.020 | 0.564 | 1.072  |
| LTR:ERV1:MER110A      | 192  | 0.006 | 0.007 | 0.004 | 0.001 | 0.551 | 0.160  |
| LTR:MaLR:MLT1E3       | 1031 | 0.026 | 0.024 | 0.013 | 0.008 | 0.505 | 0.358  |
| LINE:L1:L1M3a         | 124  | 0.003 | 0.000 | 0.001 | 0.000 | 0.448 | 0.490  |
| LTR:ERVL:LTR52        | 230  | 0.001 | 0.001 | 0.000 | 0.001 | 0.354 | 0.989  |
| LTR:ERVL:LTR16B1      | 381  | 0.013 | 0.011 | 0.004 | 0.006 | 0.304 | 0.571  |
