# Supplementary material for: hnRNP K Coordinates Transcriptional Silencing by SETDB1 in Embryonic Stem Cells
Source: PubMed Central journal article supplement (PMC4303303; doi:10.1371/journal.pgen.1004933), 2015-01-22
Supplement: pgen.1004933.s010.pdf [file pgen.1004933.s010.pdf]

## Genes upregulated in hnRNP K KD and Setdb1 KO (54)

**Red** = SETDB1-bound and/or marked by SETDB1-dependent H3K9me3 (30)

|               |          |
|---------------|----------|
| Cd97          | Ddit4l   |
| Casp14        | Igf2     |
| Taf7l         | Wfdc15a  |
| Dazl          | Zscan4c  |
| Gadd45b       | Foxi3    |
| Sdc4          | Dub1a    |
| Pltp          | Tex101   |
| Perp          | Slc25a31 |
| Mdm2          | Zscan4f  |
| Ccng1         | Gm12794  |
| Btg2          | C4b      |
| Id2           | Acad11   |
| Plk2          | Zscan4d  |
| Anxa8         |          |
| 1190002H23Rik |          |
| Cdkn1a        |          |
| Eps8l2        |          |
| Cd55          |          |
| Chit1         |          |
| 1700007K13Rik |          |
| Cyr61         |          |
| Trp53inp1     |          |
| Tinagl1       |          |
| Abcb1b        |          |
| Lrpap1        |          |
| Agpat9        |          |
| Slc25a4       |          |
| Gabarapl2     |          |
| Tbx20         |          |
| Glt25d2       |          |
| Wnt6          |          |
| Cml2          |          |
| Rtkn          |          |
| Gm12800       |          |
| Vnn1          |          |
| Ltb4r2        |          |
| Mael          |          |
| Dub3          |          |
| Ly6k          |          |
| Ankrd45       |          |
| 8030474K03Rik |          |

## Genes upregulated in common between hnRNP K KD and Kap1 KO (81)

|               |               |
|---------------|---------------|
| Bgn           | Perp          |
| Tmem92-ps     | Mdm2          |
| Gm13078       | Ccng1         |
| BC080695      | Btg2          |
| Arg2          | Plk2          |
| Usp17l5       | Anxa8         |
| Gm13109       | Cdkn1a        |
| Gm5699        | Eps8l2        |
| Gm4778        | Cd55          |
| Gm4858        | Chit1         |
| Gm5698        | 1700007K13Rik |
| Gm5662        | Cyr61         |
| Col4a2        | Tinagl1       |
| Col4a1        | Abcb1b        |
| Sct           | Lrpap1        |
| Cryab         | Agpat9        |
| Dkk1          | Slc25a4       |
| Dab2          | Wnt6          |
| Gata6         | Cml2          |
| Tmem132c      | Rtkn          |
| Dkk1l         | Gm12800       |
| Svop          | Vnn1          |
| Ptges         | Ltb4r2        |
| Finc          | Dub3          |
| Fbp2          | Ly6k          |
| Islr2         | 8030474K03Rik |
| Vgll3         | Ddit4l        |
| Cpeb2         | Igf2          |
| Wls           | Dub1a         |
| Pros1         | Gm12794       |
| Phlda1        | Acad11        |
| A430110N23Rik | Zscan4d       |
| Snai1         |               |
| Matn1         |               |
| Nkx2-9        |               |
| Gprc5a        |               |
| Lgals3        |               |
| Zbtb10        |               |
| Calcoco2      |               |
| Ctgf          |               |
| Cd63          |               |
| Fabp3         |               |
| Pmepa1        |               |
| Atp6ap1       |               |
| Mfge8         |               |
| Tpp1          |               |
| Mfsd1         |               |
| Sdc4          |               |
| Pltp          |               |

## Genes upregulated in Setdb1 KO, Kap1 KO and hnRNPK KD cells (33)

| <u>Gene</u>   | <u>BioGPS expression pattern</u>      |
|---------------|---------------------------------------|
| Sdc4          | Epidermis, Macrophage, Bone marrow    |
| Pltp          | Lung, Macrophage, Eye                 |
| Perp          | Ubiquitous                            |
| Mdm2          | Ubiquitous                            |
| Ccng1         | Ubiquitous                            |
| Btg2          | Ubiquitous                            |
| Plk2          | M-1, Brain, Macrophage                |
| Anxa8         | Ubiquitous                            |
| Cdkn1a        | Ubiquitous                            |
| Eps8l2        | M-1, Intestine, Placenta              |
| Cd55          | Mast cells, Brain                     |
| Chit1         | Epidermis, Stomach                    |
| 1700007K13Rik | Testis, ESCs                          |
| Cyr61         | M-1, Umbilical cord, Osteoblasts      |
| Tinagl1       | Placenta                              |
| Abcb1b        | Adrenal gland, Ovary                  |
| Lrpap1        | Kidney                                |
| Agpat9        | Intestin, Adipose, B-cells            |
| Slc25a4       | Skeletal muscle, Adipose, Brain       |
| Wnt6          | Ovary, Bone marrow                    |
| Cml2          | Liver                                 |
| Rtkn          | Salivary gland, Brain, ESCs           |
| Gm12800       | Unknown                               |
| Vnn1          | Blastocyst, Kidney, Placenta          |
| Ltb4r2        | Cornea                                |
| Dub3          | Unknown                               |
| Ly6k          | Testis                                |
| 8030474K03Rik | Neuro2a, testis, ESCs                 |
| Ddit4l        | Ubiquitous                            |
| Igf2          | Umbilical cord, Placenta, Osteoblasts |
| Dub1a         | Ubiquitous                            |
| Gm12794       | Ubiquitous                            |
| Acad11        | Liver, Kidney, Adipose                |
| Zscan4d       | Unknown                               |

**Unknown = data not available**
