# Supplementary material for: hnRNP K Coordinates Transcriptional Silencing by SETDB1 in Embryonic Stem Cells
Source: PubMed Central journal article supplement (PMC4303303; doi:10.1371/journal.pgen.1004933), 2015-01-22
Supplement: pgen.1004933.s011.pdf [file pgen.1004933.s011.pdf]

| <b>ChIP Target</b>         | <b>ChIP primer Name</b> | <b>Sequence (5'-3')</b>       |
|----------------------------|-------------------------|-------------------------------|
| MLV 5' LTR-int             | MLV +2                  | TGGGCAGGGGTCTCCAAATCT         |
|                            | MLV -2                  | ATAAAGCCTCTTGCTGTTTGCATC      |
| IAPEz 5' LTR-int           | IAP-LTR-ChIP-s          | GCTCCTGAAGATGTAAGCAATAAAG     |
|                            | IAP-retro-ChIP-as       | CTTCCTTGCGCCAGTCCCGAG         |
| MMERVK10c 5' LTR-int       | MMERVK10C_LTR_344-fw    | CAAATAGCCCTACCATATGTCAG       |
|                            | MMERVK10C_int_481-rv    | GTATACTTTCTTCTTCAGGTCCAC      |
| Etn 5' LTR-MusD int        | MusD&Etn2               | CCCTTCCTTCATAACTGGTGTGCGCA    |
|                            | MusD3&Etn               | TAGCATCTCTCTGCCATTCTTCAGG     |
| MERVL 5' LTR-int           | MERVL_LTR-365-fw        | CTTCATTACAGCTGCGACTG          |
|                            | MERVL_int-519-rv        | CTAGAACCACTCCTGGTACCAAC       |
| MSCV 5' LTR-PBS            | LTR 302                 | AACCATCAGATGTTTCCAGGGTG       |
|                            | LTR -500                | TTCGGATGCAAACAGCAAGAGGC       |
| MSCV Gfp internal region   | GFPcF                   | ACTACAACAGCCACAACGTCTATATCA   |
|                            | GFPcR                   | GGCGGATCTTGAAGTTCACC          |
| Ifna5 core promoter        | Ifna5 TSS-F             | AGAACCAAACAGCCAGAAG           |
|                            | Ifna5 TSS-R             | TCA GGA AAG CAC AGA GCC TA    |
| Myc core promoter          | Myc TSS-F               | CCTCCCGAGTTCCCAAAGC           |
|                            | Myc TSS-R               | CCT TCC CCA CCT CTC TCT ATT   |
| Egr1 core promoter         | Egr1 TSS-F              | TTTCAAGGGTCTGGAACAGC          |
|                            | Egr1 prom-R             | GGAGGGCTTCACGTCACTC           |
| Dazl core promoter         | Dazl qPCR F2            | TAC AAA ATG CCC GCA GAA ATA G |
|                            | Dazl qPCR R2            | CCG GAC TCA ACC TTC TCA ATG   |
| Fkbp6 core promoter        | Fkbp6 prom-F            | GTGGGATTCGGTTCTGAG            |
|                            | Fkbp6 prrom-R           | CTATCGATCACGTGCCGTTT          |
| Mael core promoter         | Mael prom-F             | GTGGGGAGAGCACTGTGATT          |
|                            | Mael prom-R             | GTT CGG GAA TGT GAA ACA CC    |
| Taf7l core promoter-+1.5kb | Taf7l prom-F            | CTCCCTCAGTGGGTGCTTC           |
|                            | Taf7l prom-R            | AGG CGA CGT GTC TCG TTA GT    |
| <b>qRT Target</b>          | <b>qRT primer Name</b>  | <b>Sequence (5'-3')</b>       |
| MLV RLTR4 MM-int           | EndPro-                 | AGAGGTATGGTTGGAATAAGTA        |
|                            | EndPro+                 | TAGATGGAGCCTACCAAGCTCTCAA     |
| IAPEz 5' LTR-int           | IAP-LTR-ChIP-s          | Same as ChIP                  |
|                            | IAP-retro-ChIP-as       | Same as ChIP                  |
| MMERVK10C 5' LTR-int       | MMERVK10C_LTR_344-fw    | Same as ChIP                  |
|                            | MMERVK10C_int_481-rv    | Same as ChIP                  |
| Etn 5' LTR- MusD int       | Etn/II-MusD 29 up_fw    | TCTTAATAATAGGGAGGAGATGTAGT    |
|                            | Etn/II-MusD LTR_123_rv  | GGTCCAGTAGAAAGGTGCGACG        |
| MERVL 5'LTR-int            | MERVL_LTR-365-fw        | Same as ChIP                  |
|                            | MERVL_int-519-rv        | Same as ChIP                  |
| MTA                        | MTA-F                   | ATGTTTTGGGGAGGACTGTG          |
|                            | MTA-R                   | AGCCCCAGTTAACCAGAAC           |
| Setdb1 exons 18-19         | Setdb1 ex18-F           | CTTCTGGCTCTGACGGTGATG         |
|                            | Setdb1 ex18-R           | GGAAGCCATGTTGGTTGATT          |

|                   |                |                               |
|-------------------|----------------|-------------------------------|
| Hnrnpk exons 8-9  | Hnrnpk ex8-F   | ATCAGAGTCTGGCAGGAGGA          |
|                   | Hnrnpk ex9-R   | TCAGTAGAGTGAGGGCAGCA          |
| Mcaf1 exons 11-12 | Mcaf1 ex11-F   | GACGATGAAGAGAGCGGAAC          |
|                   | Mcaf1 ex12-R   | CTGATGGCTGAAGAGGTGGT          |
| Ubc9 exons 4-5    | Ubc9 ex4-F     | GATGGCACAATGAACCTGATGAAC      |
|                   | Ubc9 ex5-R     | TTTGGTGGTGAGGACGGATAGTC       |
| Gata6 exons 3-4   | Gata6 ex3-F    | CCCTCATCAAGCCACAGAAG          |
|                   | Gata6 ex4-R    | CATATAGAGCCCAGCAAGCAT         |
| Gata3 exons 3-4   | Gata3 ex3-F    | TACCACCTATCCGCCCTATG          |
|                   | Gata3 ex4-R    | ACACACTCCCTGCCTTCTGT          |
| Nkx2-9 exon 1     | Nkx2-9 ex1-F   | CCTCGCACTTCCATCCTTAG          |
|                   | Nkx2-9 ex1-R   | CTAGGCTTCGCATCCTGTTC          |
| Dazl exon 4       | Dazl ex4-F     | GTGGCTTCTGCTCCACCTTCG         |
|                   | Dazl ex4-R     | CCTTGACTTGTGGTTGCTGA          |
| Fkbp6 exons 3-4   | Fkbp6 ex3-F    | TACCTGGAGCACATGGACAA          |
|                   | Fkbp6 ex4-R    | ATAGGCTGGCTTGAACAGGA          |
| Mael exons 11-12  | Mael ex11-F    | GGTTATTATCCATCTGGGGTGA        |
|                   | Mael ex12-R    | CATCTTTTTGGGGCGTGTA           |
| Taf7l exons 10-11 | Taf7l ex10-F   | TAGCCTCCATGAAGCAGACC          |
|                   | Taf7l ex11-R   | TTGAGGGTCAAGTTTTCCACTT        |
| Egr1 exons 1-2    | Egr1 ex1-F     | GAGCGAACAACCCTATGAGC          |
|                   | Egr1 ex2-R     | TTTGGCTGGGATAACTCGTC          |
| Gapdh exons 4-5   | Gapdh ex4-F    | GTG CTG AGT ATG TCG TGG AG    |
|                   | Gapdh ex5-R    | GAG ATG ATG ACC CTT TTG GCT C |
| B-actin exons 2-3 | b-actin-ex2-fw | GAACCCTAAGGCCAACCGTG          |
|                   | b-actin-ex3-rv | GGAGTCCATCACAAATGCCTG         |
